# Supplementary material for: Balancing a genetic toggle switch by real-time feedback control and periodic forcing
Source: PubMed Central journal article supplement (PMC5693866; doi:10.1038/s41467-017-01498-0), 2017-11-17
Supplement: 41467_2017_1498_MOESM1_ESM.pdf [file 41467_2017_1498_MOESM1_ESM.pdf]

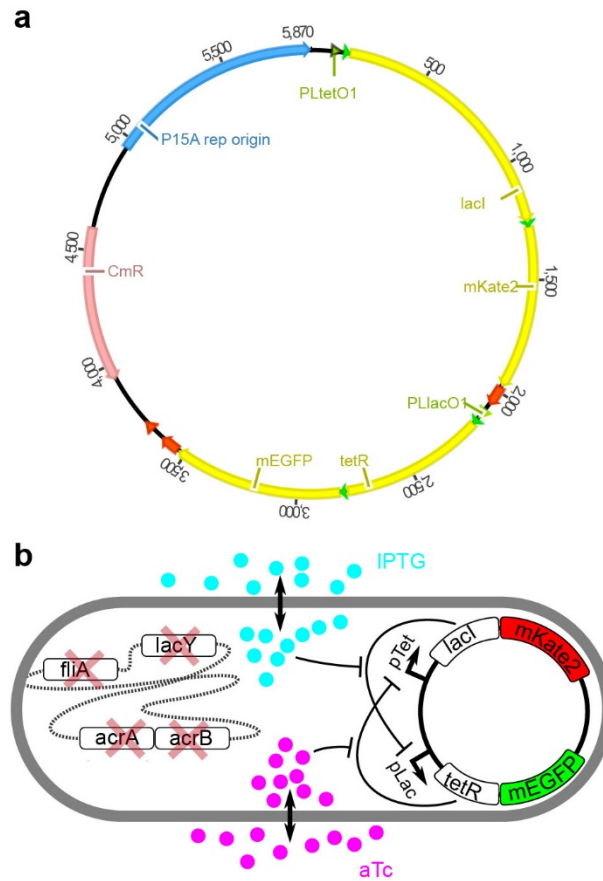

**Supplementary Figure 1. Toggle switch cells. a.** Map of the toggle switch plasmid. Yellow arrows are coding sequences (*lacI-mKate2* and *tetR-mEGFP*). Light green arrows are promoters (pLac and pTet). Dark green arrows represent ribosome binding sites (RBS). Red arrows represent terminators. The chloramphenicol resistance cassette and plasmid origin of replication are shown in pink and blue, respectively. **b.** The cellular chassis is based on the K-12 BW25113 background with the *fliA*, *lacY*, *acrA* and *acrB* genes knocked out. IPTG and aTc enter the cell by passive diffusion through the cellular membrane and interact with the LacI and TetR proteins. The cellular state is observed by monitoring the fluorescence levels of mEGFP (TetR) and mKate2 (LacI).

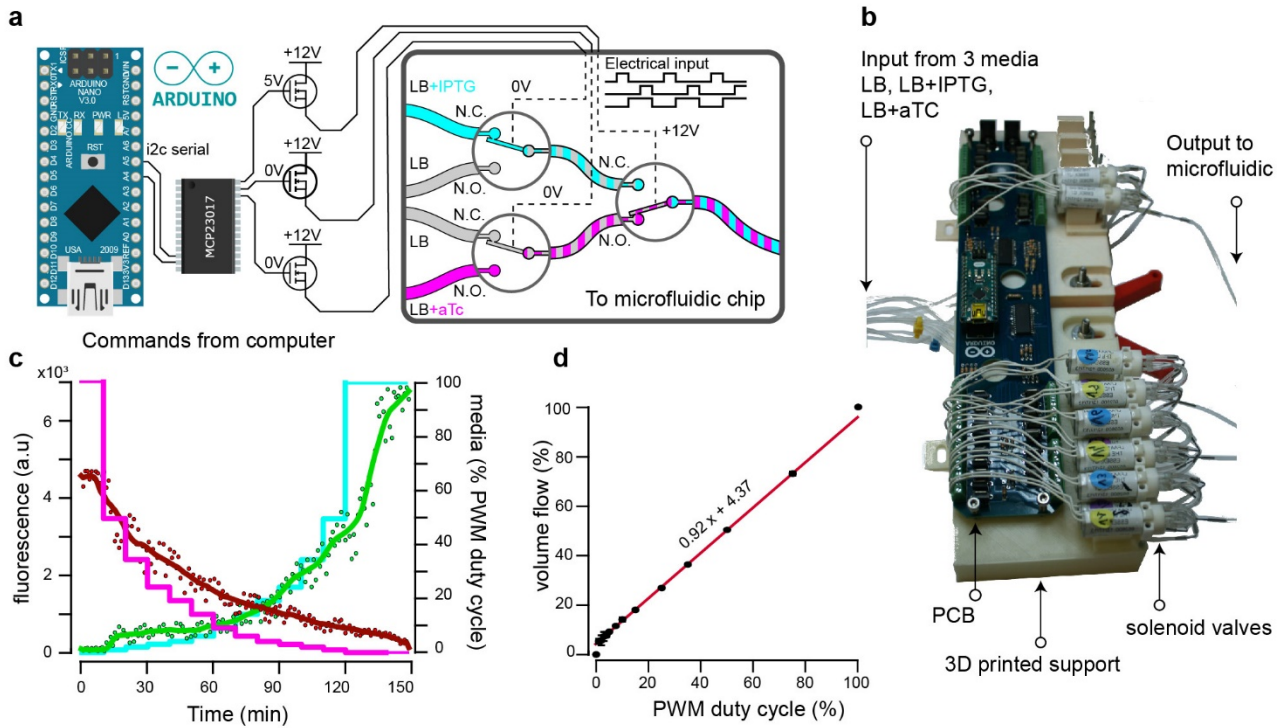

**Supplementary Figure 2. Characterization of mixing device.** **a.** Sketch of the electronic circuit controlling the fluidic valve and the principle of mixing in Pulse Width Modulation (PWM) mode. **b.** Actual mixing device showing the two triplets of valves required to run two experiments in parallel. **c.** Various concentrations of fluorescein and rhodamine were flowed through the main microfluidic device and the levels of fluorescence in the chambers were monitored. The fluorescence levels closely follow the mixing levels imposed by the valve system. **d.** Calibration experiment: PWM mixing was run over extended periods of time at different duty cycles, and volume consumption was measured.

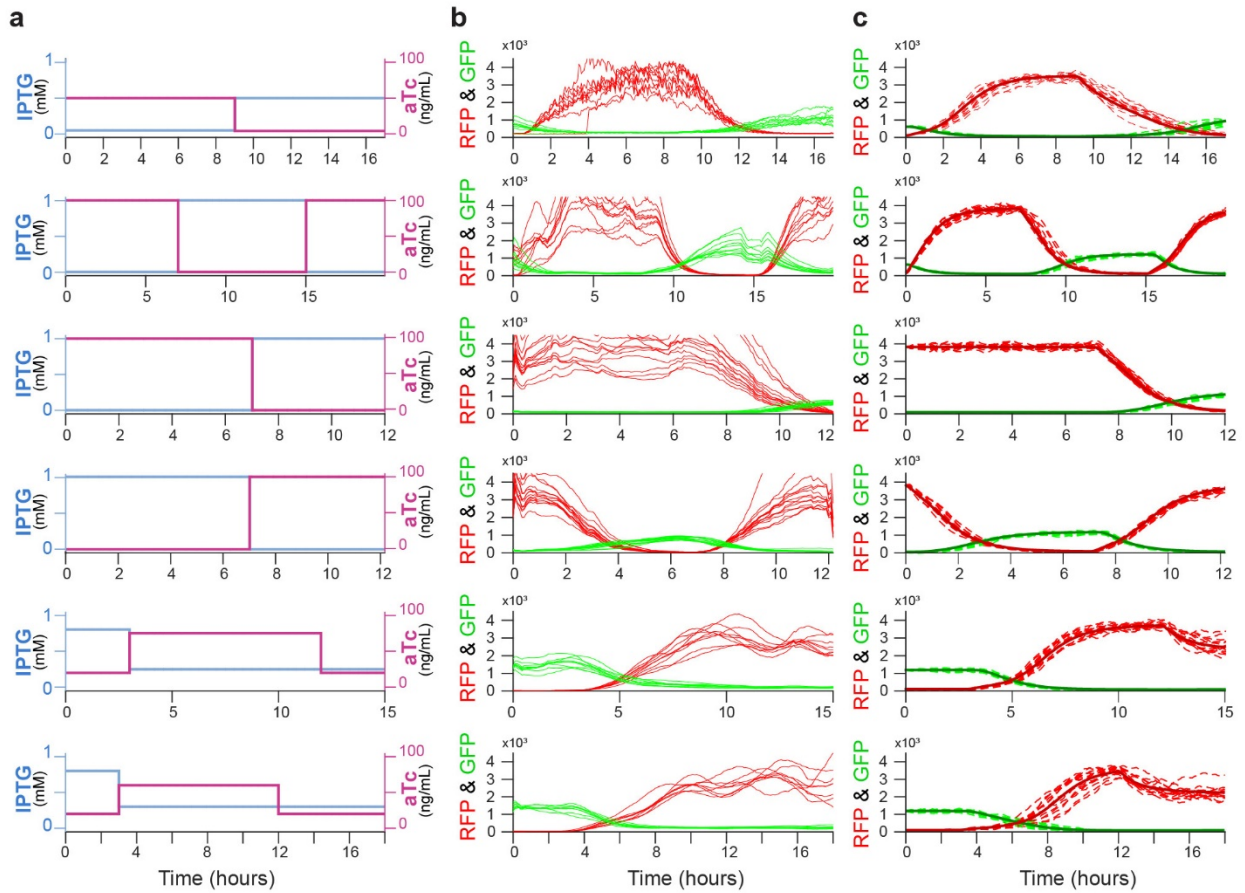

**Supplementary Figure 3. Model calibration.** **a.** Several temporal profiles using different levels of aTc and IPTG inducers were used to construct an experimental data set to characterize the behavior of the system. **b.** Corresponding temporal evolution of single cells ( $n \sim 10$  cells per experiments). Red and green lines correspond to single-cell LacI-RFP and TetR-GFP fluorescence levels in arbitrary units. **c.** Predictions obtained using the model fitted to the average behavior of all experiments. Thick red and green curves correspond to the behavior of the deterministic model. Thinner dotted lines correspond to predictions obtained using the stochastic implementation of the model. Naturally, as the stochastic model only captures intrinsic variability and as all simulations started from the same initial state, we expected that the variability of the simulated cells was smaller than the one of the observed cells.

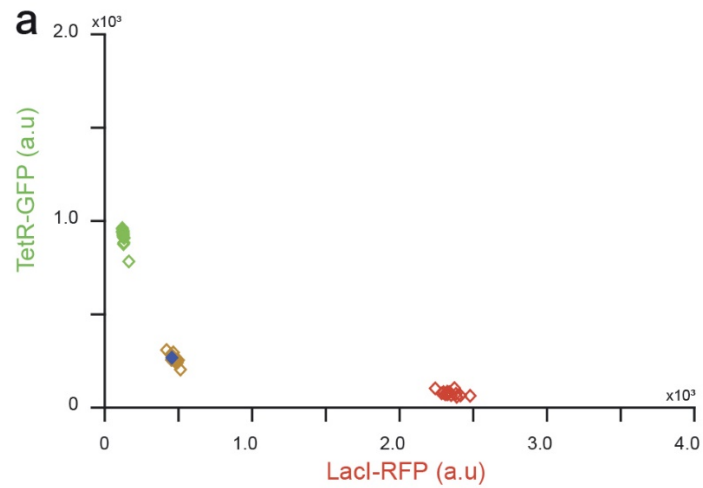

**Supplementary Figure 4. Capacity of the characterization data to constrain the locations of the equilibrium points of the deterministic model.** Distribution of the equilibrium points in the protein space under reference conditions as predicted using the 15 best-fitting parameter sets when the optimization was iterated 30 times. LacI-dominant and TetR-dominant stable equilibria are represented by red and green diamonds, whereas unstable equilibria are represented by yellow diamonds. The set-point used in control experiments is represented by a blue square.

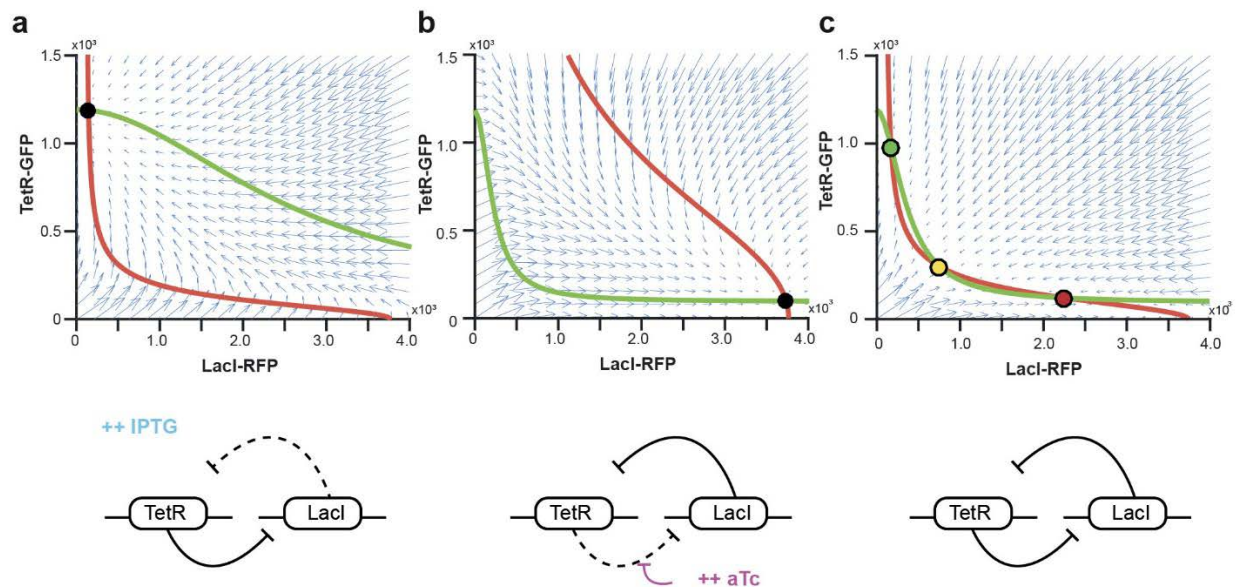

**Supplementary Figure 5. Influence of IPTG and aTc on the bistable behavior of the toggle switch.** **a.** State space in the presence of an excess of IPTG (1 mM) as predicted by the numerical model. Addition of IPTG turns off the repression of the *tetR* gene by LacI. As a result, TetR is fully expressed and the system only presents one stable, attractive state: all cells will turn green eventually. **b.** Similarly, an excess of aTc (100 ng.mL<sup>-1</sup>) turns off the repression of the *lacI* gene by TetR. As a result, LacI is fully expressed and cells will eventually reach the unique stable state (high level of LacI-RFP). **c.** An interesting case occurs when both branches are in competition (aTc = 20 ng.mL<sup>-1</sup>, IPTG = 0.25 mM), so that there are two stable equilibria and one unstable equilibrium (see Figure 1 and Main text) and reproduced here numerically using a deterministic model. The red and green curves shown in (a-c) are the LacI and TetR nullclines computed using the fitted model under different operating conditions. By definition, equilibria are located at nullcline intersections.

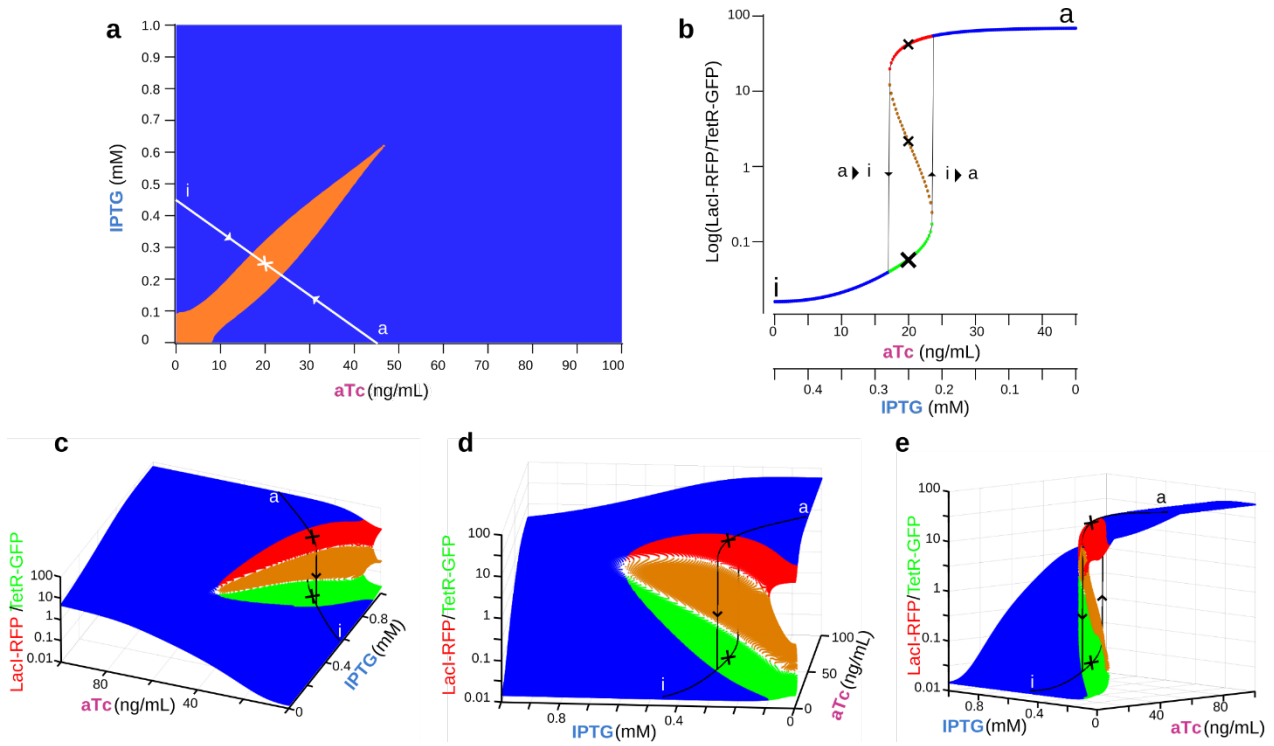

**Supplementary Figure 6. Stability analysis of the toggle switch circuit in different environments. a.** Representation of the stability of the circuit as a function of inducer concentrations. Blue and orange regions represent the conditions under which the system is mono- or bi-stable, respectively. The white segment going from point a (full aTc;  $aTc = 45 \text{ ng}\cdot\text{mL}^{-1}$ ,  $\text{IPTG} = 0$ ) to point i (full IPTG;  $aTc = 0$ ,  $\text{IPTG} = 0.45 \text{ mM}$ ) passes through the reference concentrations for this study (white cross,  $aTc = 20 \text{ ng}\cdot\text{mL}^{-1}$  and  $\text{IPTG} = 0.25 \text{ mM}$ ). **b.** Logarithm of the LacI-RFP/TetR-GFP ratio of the stable and unstable equilibrium points are represented for different concentrations of aTc and IPTG along the white segment of panel (a). Monostable points are represented in blue. LacI-dominant and TetR-dominant stable points of the bistable region are represented in red and green, respectively. Unstable equilibrium points of the bistable region are represented in orange. Along this line, the system shows hysteresis. **c-e.** Same representation of the stability of the equilibria of system as in (b) represented in the aTc/IPTG plane. Different views of the cusp-catastrophe curve. The hysteresis line from panel (a) and (b) is represented in black.

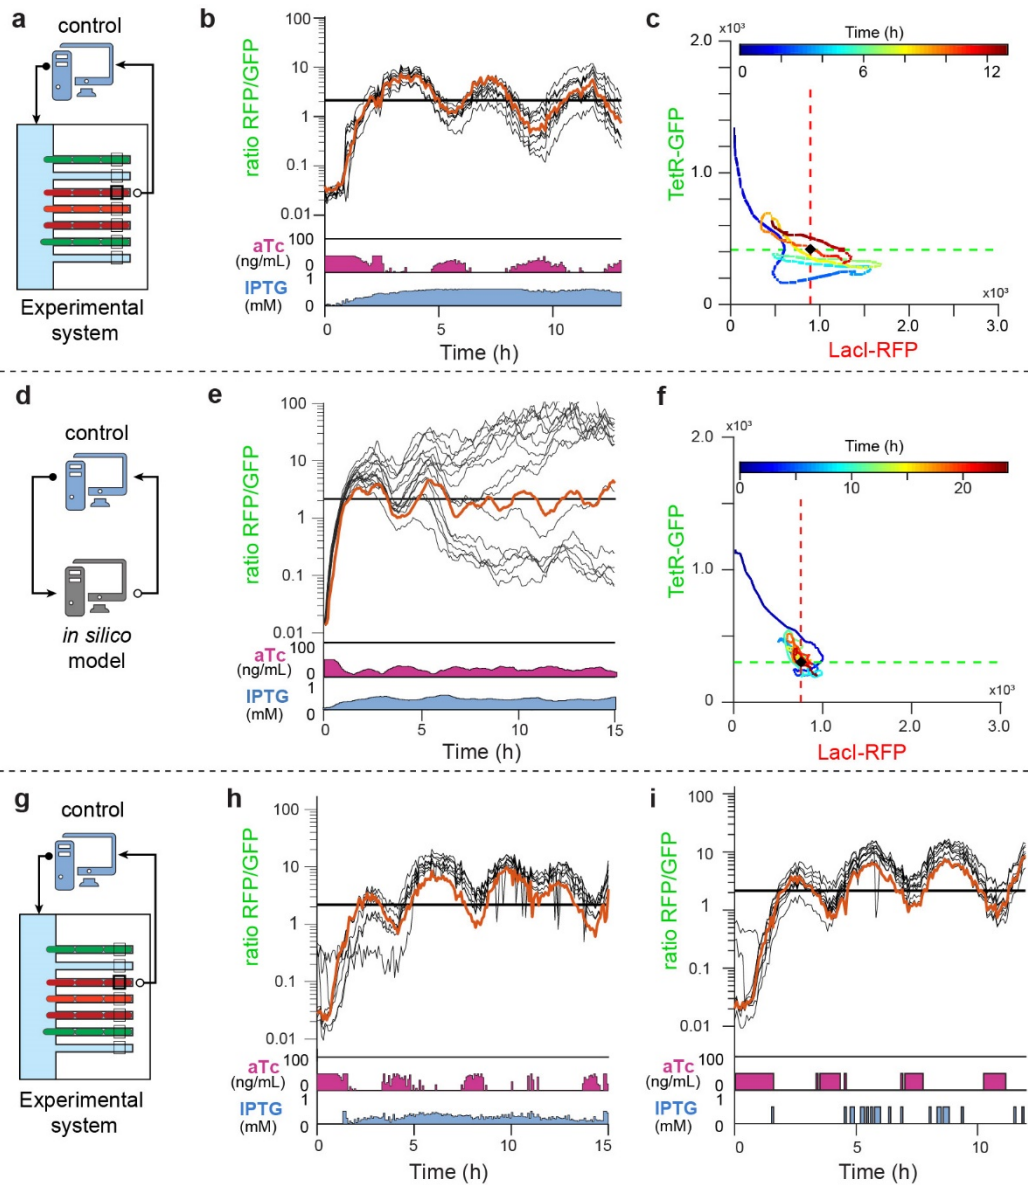

**Supplementary Figure 7. Other example of PI control experiments.** **a.** Experimental control runs. **b.** Ratio of red (LacI-RFP) and green (TetR-GFP) fluorescence levels as a function of time using a double PI controller to drive protein expressions. The parameters of the PI dual controller are  $K_p^L = 5.0 \cdot 10^{-2}$ ,  $K_I^L = 2.0 \cdot 10^{-4} \text{ s}^{-1}$ ,  $K_p^T = 2.5 \cdot 10^{-2}$ ,  $K_I^T = 6.94 \cdot 10^{-4} \text{ s}^{-1}$  (see Methods). Thick orange and thin black lines represent controlled and non-controlled cells ( $n = 10$ ), respectively. **c.** Trajectory of the controlled cells in the state space. The cell starts from a high TetR-GFP state and then moves towards the target point (black diamond) while describing large oscillations around the target. Time is color coded from  $t = 0 \text{ h}$  (blue) to  $t = 12 \text{ h}$  (red). **d.** *In silico* control runs. **e.** Ratio of red (LacI-RFP) and green (TetR-GFP) fluorescence levels as a function of time using a double PI controller to drive simulated cells ( $n = 20$ ). The PI parameters are  $K_p^L = 5.0 \cdot 10^{-2}$ ,  $K_I^L = 2.0 \cdot 10^{-4} \text{ s}^{-1}$ ,  $K_p^T = 2.5 \cdot 10^{-2}$ ,  $K_I^T = 6.94 \cdot 10^{-4} \text{ s}^{-1}$ . **f.** Trajectory of the controlled cell for *in silico* control experiments. **g.** Experimental control runs. **h.** Ratio of red (LacI-RFP) and green (TetR-GFP) fluorescence levels of single cells ( $n = 8$ ) as a function of time using a double PI controller to drive protein expressions. The PI parameters are  $K_p^L = 5.0 \cdot 10^{-2}$ ,  $K_I^L = 2.0 \cdot 10^{-4} \text{ s}^{-1}$ ,  $K_p^T = 2.5 \cdot 10^{-2}$ ,  $K_I^T = 6.94 \cdot 10^{-4} \text{ s}^{-1}$ . **i.** Ratio of red (LacI-RFP) and green (TetR-GFP) fluorescence levels of single cells ( $n = 8$ ) as a function of time using a double Bang-bang controller to drive protein expressions.

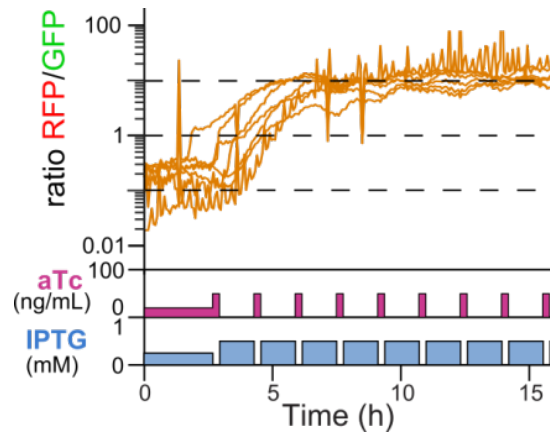

**Supplementary Figure 8. Too Fast periodic forcing experiments.** Ratio of the red (LacI-RFP) and green (TetR-GFP) fluorescence levels of cells subjected to periodic stimulations with alternating high aTc and high IPTG concentrations. The cells were grown in 0.25 mM IPTG and  $20 \text{ ng}\cdot\text{mL}^{-1}$  aTc prior to the experiment and during the first 2.5 hours. They were then subjected to alternations of 0.5 mM IPTG for 75 min,  $50 \text{ ng}\cdot\text{mL}^{-1}$  aTc for 15 min. The cells do not remain in a state of balanced expression, and instead drift to the LacI-RFP high state.



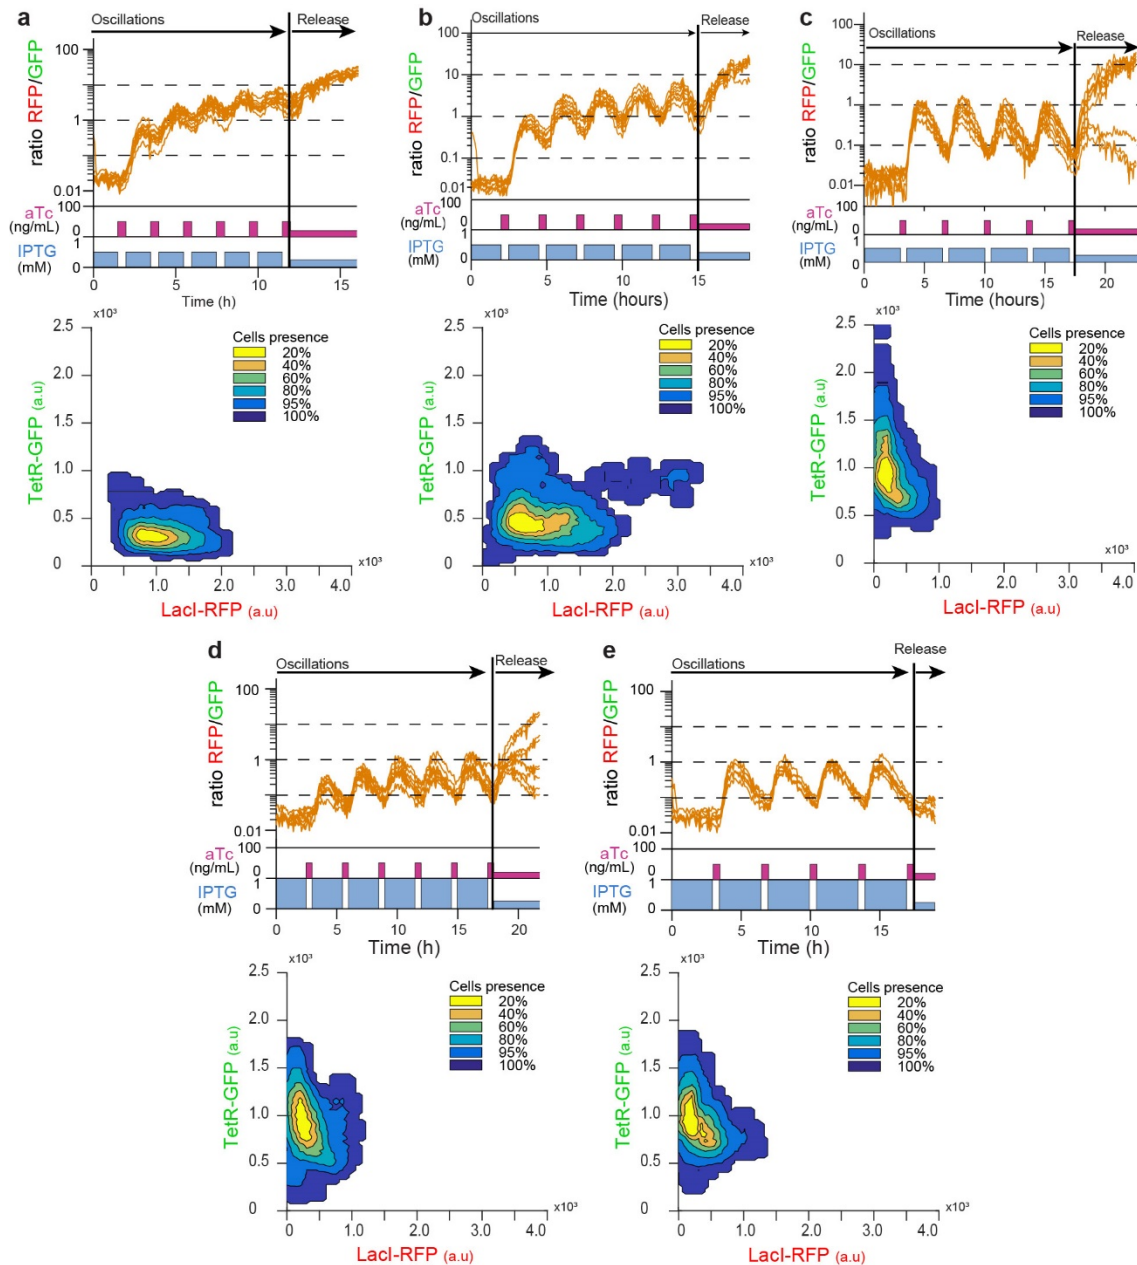

**Supplementary Figure 9. Additional periodic forcing experiments.** Ratio of the red (LacI-RFP) and green (TetR-GFP) fluorescence levels of cells subjected to periodic stimulations with alternating high aTc and high IPTG concentrations. All cells present a similar behavior and remain in a state of balanced expression. Cell probability of presence for the two last input periods is shown below. Experimental conditions were: **(a)** 0.5 mM IPTG for 90 min,  $50 \text{ ng}\cdot\text{mL}^{-1}$  aTc for 30 min,  $n=12$ ; **(b)** 0.5 mM IPTG for 120 min,  $50 \text{ ng}\cdot\text{mL}^{-1}$  aTc for 30 min,  $n = 10$ ; **(c)** 0.5 mM IPTG for 180 min,  $50 \text{ ng}\cdot\text{mL}^{-1}$  aTc for 30 min,  $n = 10$ ; **(d)** 1.0 mM IPTG for 150 min,  $50 \text{ ng}\cdot\text{mL}^{-1}$  aTc for 30 min,  $n = 9$ ; **(e)** 1.0 mM IPTG for 180 min,  $50 \text{ ng}\cdot\text{mL}^{-1}$  aTc for 30 min,  $n = 7$ . As expected, the average ratio shifted to RFP when the periodic forcing favored aTc over IPTG. At some point, periodic forcing was stopped to observe release of the cells. Cells were **(a-b)** subsequently attracted to the RFP dominant state; **(c-d)** split into two sub-populations attracted to either RFP or GFP dominant states; or **(e)** attracted to the GFP dominant state.

## Supplementary Table 1

|                                                                      |                 |                     |                                               |                      |                    |
|----------------------------------------------------------------------|-----------------|---------------------|-----------------------------------------------|----------------------|--------------------|
| Transcription rates<br>(mRNA min <sup>-1</sup> )                     | $\kappa_L^{m0}$ | 3.20e-2 (3.045e-1)  | <i>plac</i> regulation<br>by TetR             | $\theta_{LacI}$      | 31.94 (124.9)      |
|                                                                      | $\kappa_T^{m0}$ | 1.19e-1 (3.313e-1)  |                                               | $\eta_{LacI}$        | 2.00 (2.00)        |
|                                                                      | $\kappa_L^m$    | 8.30 (13.01)        |                                               | $\theta_{IPTG}$      | 9.06e-2 (2.926e-1) |
|                                                                      | $\kappa_T^m$    | 2.06 (5.055)        |                                               | $\eta_{IPTG}$        | 2.00 (2.00)        |
| Translation rates<br>(a.u. mRNA <sup>-1</sup><br>min <sup>-1</sup> ) | $\kappa_L^p$    | 9.726e-1 (6.606e-1) | <i>ptet</i> regulation<br>by LacI             | $\theta_{tetR}$      | 30.00 (76.40)      |
|                                                                      | $\kappa_T^p$    | 1.170 (5.098e-1)    |                                               | $\eta_{TetR}$        | 2.00 (2.152)       |
| Degradation rates<br>(min <sup>-1</sup> )                            | $g_L^m$         | 1.386e-1            | IPTG exchange<br>rate<br>(min <sup>-1</sup> ) | $\theta_{aTc}$       | 11.65 (35.98)      |
|                                                                      | $g_T^m$         | 1.386e-1            |                                               | $\eta_{aTc}$         | 2.00 (2.00)        |
|                                                                      | $g_L^p$         | 1.65e-2             | $\kappa_{IPTG}^{in}$                          | 2.75e-2 (4.00e-2)    |                    |
|                                                                      | $g_T^p$         | 1.65e-2             | $\kappa_{IPTG}^{out}$                         | 1.11e-1 (4.00e-2)    |                    |
|                                                                      |                 |                     | aTc exchange<br>rate<br>(min <sup>-1</sup> )  | $\kappa_{aTc}^{in}$  | 1.62e-1 (N/A)      |
|                                                                      |                 |                     |                                               | $\kappa_{aTc}^{out}$ | 2.00e-2 (N/A)      |

**Supplementary Table 1. Parameters for the toggle switch model.** Threshold parameters are expressed in arbitrary fluorescence units (a.u.) for proteins ( $\theta_{LacI}$  and  $\theta_{TetR}$ ), ng.mL<sup>-1</sup> for aTc ( $\theta_{aTc}$ ), and mM for IPTG ( $\theta_{IPTG}$ ). The values of 4 parameters were fixed. mRNA degradation rates were fixed based on typical half-life of 5 minutes for mRNAs in *E. coli* (1). Protein apparent degradation rates were set based on estimates of cell cycle times in our experiments (~42 min). We therefore assumed that dilution due to growth dominates over actual protein degradation. Note that the significant difference between the mRNA and protein apparent degradation rates allowed us to employ a quasi-steady state assumption in which mRNAs are assumed to be at the steady state levels set by the concentration of the repressors. The dynamics of the 4D system could then be represented in the 2D protein space. For the sake of simplicity, in the main text the latter is called the state space. Realistic initial values for the search were obtained as explained below. Previous work has quantified that the number of mRNAs produced by a fully induced *lac* promoter is ~60 per cell (2). Then the comparison of regulatory ranges and leakage levels given in (3) led to us estimate that the transcription rate of a fully induced *tet* promoter is ~25% higher than the one of *plac*. This provided us with estimates of transcription rates. Lastly, an estimate of translation rates in arbitrary fluorescence units can be deduced from fluorescence levels at maximal induction (3700 a.u. for LacI and 1200 a.u. for TetR) and previous parameter estimates. Global optimization was then used to fit model predictions to calibration data, leading to a first model (parameter values in parenthesis). The addition of non-identical exchange rates in and out of the cell called for a recalibration of the parameters. This has been done by global optimization followed by limited manual adjustments, and has led to the reference model. Lastly, initial conditions were the steady state concentrations that correspond to the pre-incubation media (1 mM IPTG and no aTc, unless specified otherwise).

# Supplementary Note 1

LOCUS Toggle\_switch 7405 bp DNA circular UNA 15-SEP-2017  
DEFINITION Concatenation of 2 sequences.  
ACCESSION urn.local...h-829ke6r  
VERSION urn.local...h-829ke6r  
KEYWORDS .  
SOURCE  
ORGANISM

FEATURES Location/Qualifiers  
misc\_feature 21..70  
/note="Geneious type: Homology"  
protein\_bind 111..129  
protein\_bind 130..135  
protein\_bind 136..153  
protein\_bind 153..158  
RBS 169..185  
CDS 186..878  
misc\_feature 879..896  
/note="Geneious type: linker"  
CDS 897..2018  
terminator 2023..2111  
protein\_bind 2138..2154  
protein\_bind 2155..2160  
protein\_bind 2161..2177  
protein\_bind 2178..2183  
RBS 2195..2211  
CDS 2212..2925  
misc\_feature 2926..2943  
/note="Geneious type: linker"  
CDS 2944..3597  
terminator 3602..3683  
misc\_feature complement(3729..3776)  
/note="natural FRT site"  
CDS complement(3789..4583)  
/note="kanamycin resistance"  
/codon\_start=1  
/transl\_table=11  
/product="Tn5 neomycin phosphotransferase"  
/protein\_id="AAL02037.1"  
/db\_xref="GI:15554336"  
  
/translation="MIEQDGLHAGSPAAWVERLFGYDWAQQTIGCSDAAVFRLSAQGR  
PVLVFKTDLSGALNELQDEAARLSWLATTGVPCAAVLDVVTEAGRDWLLLGEVPGQDL  
LSSHLPAEKVSIMADAMRRLHTLDPATCPFDPDHQAKHRIERARTRMEAGLVDQDDLDE  
EHQGLAPAELFARLKARMPDGEDLVVTHGDACLPNIMVENGRFSGFIDCGRLGVADRY  
QDIALATRDIAEELGGEWADRFLVLYGIAAPDSQRIAFYRLLDEFF"  
misc\_feature complement(4951..4985)  
/note="distal 35-nt of natural FRT site"  
misc\_feature 5039..5088  
/note="Geneious type: Homology"  
misc\_feature 5093..5116  
terminator 5140..5187  
CDS complement(5407..6066)  
rep\_origin 6428..7340

## ORIGIN

```
1 tgccgaattc ggatccggag atgctcaccg ttaagcagat tgaagcagca aagccgaaag
61 aaaaaccata cgctgcaaca aatgcctaca actagaattc gagctcggag tccctatcag
121 tgatagagat tgacatccct atcagtgata gagatactga gcactacttc acacaggact
```

181 actaaatgtc tgagctgatt aaggagaaca tgcacatgaa gctgtacatg gagggcaccg  
241 tgaacaacca ccacttcaag tgcacatccg agggcgaagg caagccctac gagggcaccg  
301 agaccatgag aatcaaggcc gtcgagggcg gccctctccc ctctgccttc gacatcctgg  
361 ctaccagctt catgtacggc agcaaaacct tcatcaacca caccagggc atccccgact  
421 tctttaagca gtccttccct gagggcttca catgggagag agtcaccaca tacgaagatg  
481 ggggcgtgct gaccgctacc caggacacca gcctccagga cggctgcctc atctacaacg  
541 tcaagatcag aggggtgaac ttcccatcca acggccctgt gatgcagaag aaaacactcg  
601 gctgggaggc ctccaccgag acgctgtacc ccgctgacgg cggcctggaa ggcagagccg  
661 acatggccct gaagctcgtg ggcgggggccc acctgatctg caacttaaag accacataca  
721 gatccaagaa acccgctaag aacctcaaga tgcccggcgt ctactatgtg gacagacgac  
781 tggaaagaat caaggaggcc gacaaagaaa cctacgtcga gcagcacgag gtggctgtgg  
841 ccagatactg cgacctccct agcaaactgg ggcacagatc tggatccgga tcttccgtga  
901 atgtgaaacc agtaacgtta tacgatgtcg cagagtatgc cgggtgtctct tatcagaccg  
961 tttcccgcgt ggtgaaccag gccagccacg tttctgcgaa aacgcgggaa aaagtggaag  
1021 cggcgatggc ggagctgaat tacattccca accgcgtggc acaacaactg gcgggcaaac  
1081 agtcgttgct gattggcgtt gccacctcca gtctggccct gcacgcgccg tcgcaaattg  
1141 tcgcggcgat taaatctcgc gccgatcaac tgggtgccag cgtgggtggg tcgatggtag  
1201 aacgaagcgg cgtcgaagcc tgtaaagcgg cgggtcacaa tcttctcgcg caacgcgtca  
1261 gtggctgat cattaactat ccgctggatg accaggatgc cattgctgtg gaagctgcct  
1321 gcaactatgt tccggcgtta tttcttgatg tctctgacca gacacctatg acagtatta  
1381 ttttctccca tgaagatggg acgcgactgg gcgctggagca tctggtcgcg ttgggtcacc  
1441 agcaaatcgc gctgttagcg gcccattaa gttctgtctc ggcgcgtctg cgtctggctg  
1501 gctggcataa atatctcact cgcaatcaaa ttcagccgat agcggaaacgg gaaggcgact  
1561 ggagtgccat gtccggtttt caacaaacca tgcaaatgct gaatgagggc atcgttccca  
1621 ctgcgatgct ggttgccaac gatcagatgg cgctgggccc aatgcgcgcc attaccgagt  
1681 ccgggctgcy cgttggtgcy gatatctcgg tagtgggata cgacgatacc gaagatagct  
1741 catgttatat cccgccgtta accaccatca aacaggattt tcgcctgctg gggcaacca  
1801 gcgtggaccg cttgctgcaa ctctctcagg gccaggcggg gaagggcaat cagctgttgc  
1861 ccgtctcact ggtgaaaaga aaaaccaccg tggcgcccaa tacgcaaacc gcctctcccc  
1921 gcgcgttggc cgattcatta atgcagctgg cacgacaggt ttcccactg gaaagcgggc  
1981 aggctgcaaa cgacgaaaac tacgctttag tagcttaagc tttagagatc aagccttaac  
2041 gaactaagac cccgcaccg aaaggctcgg ggggtttttt tgacctaaa aacataaccg  
2101 aggagcagac acgctttacg aatcccatg gggagaattg tgagcggata acaattgaca  
2161 ttgtgagcgg ataacaagat actgagcaca tacttcacac aggactacta aatgagcaag  
2221 ggcgaggagc tgttcaccgg ggtggtgcc atcctggtcg agctggacgg cgacgtaaac  
2281 ggccacaagt tcagcgtgtc cggcgagggc gagggcgatg ccacctacgg caagctgacc  
2341 ctgaagttca tctgcaccac cggcaagctg cccgtgccct ggcccaccct cgtgaccacc  
2401 ctgacctacg gcgtgcagtg cttcagccgc taccctgacc acatgaagca gcacgacttc  
2461 ttcaagtccg ccatgcccga aggctacgtc caggagcgca ccatcttctt caaggacgac  
2521 ggcaactaca agaccgcgcg cgaggtgaag ttcgagggcg acaccctggg gaaccgcatc  
2581 gagctgaagg gcatcgactt caaggaggac ggcaacatcc tggggcaciaa gctggagtac  
2641 aactacaaca gccacaacgt ctatatcatg gccgacaagc agaagaacgg catcaagggtg  
2701 aacttcaaga tccgccacaa catcgaggac ggcagcgtgc agctcgcgca ccactaccag  
2761 cagaacaccc ccatcggcga cggccccgtg ctgctgcccg acaaccacta cctgagcacc  
2821 cagtccaagc tgagcaaaga ccccacgag aagcgcgatc acatggtcct gctggagttc  
2881 gtgaccgccc ccgggatcac tctcggcatg gacgagctgt acaagtctgg atccggatct  
2941 tcctccagat tagataaaaag taaagtgatt aacagcgcct tagagctgct taatgaggtc  
3001 ggaatcgaag gtttaacaac ccgtaaactc gccagaagc taggtgtaga gcagcctaca  
3061 ttgtattggc atgtaaaaaa taagcgggct ttgctcgacg ccttagccat tgagatgtta  
3121 gataggcacc ataactcactt ttgcccttta gaaggggaaa gctggcaaga ttttttacgt  
3181 aataacgcta aaagttttag atgtgcttta ctaagtcacg gcgatggagc aaaagtacat  
3241 ttaggtacac ggcctacaga aaaacagtat gaaactctcg aaaatcaatt agccttttta  
3301 tgccaacaag gtttttccact agagaatgca ttatatgcac tcagcgtgtg ggggcatttt  
3361 actttaggtt gcgtattgga agatcaagag catcaagtcg ctaaagaaga aagggaaaca  
3421 cctactactg atagtatgcc gccattatta cgacaagcta tcgaattatt tgatcaccia  
3481 ggtgcagagc cagccttctt attcggcctt gaattgatca tatgaggatt agaaaaaca  
3541 cttaaatgtg aaagtgggtc cgctgcaaac gacgaaaact acgcttttagt agcttaagct  
3601 ttcggtcagt ttcacctgat ttacgtaaaa acccgcttcg gcgggttttt gcttttgag  
3661 gggcagaaag atgaatgact gtccgctcag agaattcca tggggagtgt gtaggctgga  
3721 gctgcttcga agttcctata ctttctagag aataggaact tcggaatagg aacttcaaga  
3781 tccccttatt agaagaactc gtcaagaagg cgatagaagg cgatgcgctg cgaatcggga  
3841 gcggcgatac cgtaaagcac gaggaagcgg tcagcccatc cgccgccaag ctcttcagca  
3901 atatcacggg tagccaacgc tatgtcctga tagcgggtccg ccacaccag ccggccacag  
3961 tcgatgaatc cagaaaagcg gccattttcc accatgatat tcggcaagca ggcacgcca

4021 tgggtcacga cgagatcctc gccgtcgggc atgcgcgctt tgagcctggc gaacagttcg  
4081 gctggcgcg gcccctgatg ctcttcgtcc agatcatcct gatcgacaag accggcttcc  
4141 atccgagtac gtgctcgctc gatgctgatgt ttcgcttggg ggtcgaatgg gcaggtagcc  
4201 ggatcaagcg tatgacgccc ccgcattgca tcagccatga tggatacttt ctcggcagga  
4261 gcaaggtgag atgacaggag atcctgcccc ggcacttcgc ccaatagcag ccagtcctt  
4321 cccgcttcag tgacaacgtc gagcacagct gcgcaaggaa cgcccgtcgt ggccagccac  
4381 gatagccgcy ctgcctcgtc ctgcaagttca ttcagggcac cggacaggtc ggtcttgaca  
4441 aaaagaaccg ggcgccccctg cgctgacagc cggaaacacgg cggcatcaga gcagccgatt  
4501 gtctgtttgt cccagtcata gccgaatagc ctctccaccc aagcggccgg agaacctgcy  
4561 tgcaatccat cttgttcaat catgcgaaac gatcctcatc ctgtctcttg atcagatctt  
4621 gatcccctgc gccatcagat ccttggcggc aagaaagcca tccagtttac tttgcagggc  
4681 ttcccaacct taccagaggg cgcctcagct ggcaattccg gttcgcttgc tgcataaa  
4741 accgcccagt ctagctatcg ccatgtaagc cactgcaag ctacctgctt tctctttgcy  
4801 cttgcgtttt cccttgcca gatagcccag tagctgacat tcatccgggg tcagaccgct  
4861 ttctgcyggac tggctttcta cgtgttccgc ttcctttagc agccttgcy ccctgagtg  
4921 ttgcyggcagc gtgagcttca aaagcgtctt gaagttccta tactttctag agaataggaa  
4981 cttcgaactg caggtcgacy gatccccggc attaatcgc ttgtggaatt cctcgagggg  
5041 gaaatgatgc aatggtgggc ggactggctt gatgagaagg tggagtgacy ctgagcgagg  
5101 atgcacatgt gaccgagggg gccaccgct gagcaataac tagcataacc ccttggggcc  
5161 tctaaacggy tcttgagggg ttttttgctg aaacctcagc catttgagaa gcacacggct  
5221 acactgcttc cggtagtcaa taaaccggtg aaccagcaat agacataagc ggtatttaa  
5281 cgaccctgcc ctgaaccgac gaccggctcg aatttgctt cgaatttctg ccattcatcc  
5341 gcttattatc acttattcag gcgtagcacc aggcgtttaa gggaccaat aactgcctta  
5401 aaaaaattac gccccgcct gccactcatc cgagtactgt tgtaattcat taagcattct  
5461 gccgacatgg aagccatcac agacggcatg atgaacctga atcgccagcy gcacagcac  
5521 cttgtcgcct tgcgtataat attgcccct agtgaaaacy gggcgaaaga agttgtccat  
5581 attggccagc tttaaatcaa aactggtgaa actcaccag ggattggctg agacgaaaa  
5641 catattctca ataaacctt tagggaaata ggccaggtt taccgtaac acgccacatc  
5701 ttgcgaatat atgtgtagaa actgcccggaa atcgctcgtg tattcactcc agagcgatga  
5761 aaacgtttca gtttgcctat ggaacacggg gtaacaaggg tgaacactat cccatcac  
5821 cagctcaccg tctttcattg ccatacggaa ctccggatga gcattcatca ggcgggcaag  
5881 aatgtgaata aaggccggat aaaacttgtg cttattttt tttacggtct ttaaaaggc  
5941 cgtaatatcc agctgaacgy tctggttata ggtacattga gcaactgact gaaatgcctc  
6001 aaaatgttct ttacgatgcc attgggatat atcaacggtg gtatatccag tgatttttt  
6061 ctccatttta gcttccttag ctctgaaaa tctcgataac tcaaaaaata cgccggtag  
6121 tgatcttatt tcattatggg gaaagttgga acctcttacg tgccgatcaa cgtctcatt  
6181 tcgcaaaaag ttggcccagg gcttcccgg atcaacaggg acaccaggat ttatttattc  
6241 tgcgaagtga tcttccgctc caggtattta ttcggcgcaa agtgcgctcg gtgatgctgc  
6301 caacttactg atttagtgtg tgatggtgtt tttgaggtgc tccagtggt tctgtttcta  
6361 tcagctgtcc ctctgttca gctactgacy ggggtggtgcy taacggcaaa agcaccgcy  
6421 gacatcagcy ctagcggagt gtatactggc ttactatgtt ggcactgatg aggtgtcag  
6481 tgaagtgtct catgtggcag gagaaaaaag gctgcaccgy tgcgctagca gaatatgtga  
6541 tacaggatat attcgcctc ctgcctcact gactcgtctac gctcggctcgt tcgactgcy  
6601 cgagcggaaa tggcttacga acggggcgga gatttcttgg aagatgccag gaagatactt  
6661 aacaggggag tgagagggcc gcggcaagc cgtttttcca taggctcgc cccctgaca  
6721 agcatcacga aatctgacy tcaaatcagt ggtggcgaaa cccgacagga ctataaagat  
6781 accagcgctt tcccctggcy gctcctcgt gcgctctct gttcctgctt ttcggtttac  
6841 cgggtgtcatt ccgctgttat ggccgcttt gtctcattcc acgctgaca ctcagttccg  
6901 ggtaggcagt tcgctccaag ctggactgta tgcacgaacc cccgctttag tccgaccgct  
6961 gcgccttatc cggtaactat cgtcttgagt ccaacctgga aagacatgca aaagcaccac  
7021 tggcagcagc cactggtaat tgatttagag gagttagtct tgaagtcatg cgccggttaa  
7081 ggctaaactg aaaggacaag ttttgggtgac tgcgctctc caagccagtt acctcggttc  
7141 aaagagttgg tagctcagag aaccttcgaa aaaccgctt gcaaggcggg tttttcgttt  
7201 tcagagcaag agattacgcy cagacaaaa cgatctcaag aagatcatct tattaatcag  
7261 ataaaatatt tctagatttc agtgcaattt atctcttcaa atgtagcacc tgaagtacg  
7321 cccatacgat ataagttgta attctcatgt tagtcatgcy ccgccccac cggaaggagc  
7381 tgactgggtt gaaggctctc aaggg

## Supplementary References

1. M. A. Moran *et al*, Sizing up metatranscriptomics. *The ISME Journal*. **7**, 237-243 (2013).
2. L. H. So *et al*, General properties of transcriptional time series in *Escherichia coli*. *Nature Genetics*. **43**, 554-560 (2011).
3. R. Lutz, H. Bujard, Independent and tight regulation of transcriptional units in *Escherichia coli* via the LacR/O, the TetR/O and AraC/I1-I2 regulatory elements. *Nucleic Acids Research*. **25**, 1203-1210 (1997).
